# Supplementary material for: Nonlinear Spike-And-Slab Sparse Coding for Interpretable Image Encoding
Source: PubMed Central journal article supplement (PMC4425358; doi:10.1371/journal.pone.0124088), 2015-05-08
Supplement: pone.0124088.s001.pdf [file pone.0124088.s001.pdf]

# S1 Derivation

## M-Step Parameter Equation Derivations

The optimal parameters that maximize the data log-likelihood under the generative model can be sought by Expectation Maximization (EM) algorithm (see eg., [1]), which iteratively optimizes a lower bound  $\mathcal{F}(\Theta, q)$  of the likelihood w.r.t. the parameters  $\Theta$  and a distribution  $q$ :

$$\mathcal{L}(\Theta) \geq \mathcal{F}(\Theta, q_{\Theta'}) = \sum_{n=1}^N \sum_s q_n(\vec{s}|\Theta') \log \frac{p(y^{(n)}, \vec{s}|\Theta)}{q_n(\vec{s}|\Theta')} \quad (1)$$

$$= \langle \log p(\vec{y}, \vec{s} | \Theta) \rangle_{q(\vec{s}|\Theta')} + \mathbb{H}[q(\vec{s}|\Theta')]. \quad (2)$$

Each iteration consists of an E-step and an M-step. The E-step optimizes the lower bound w.r.t. to the distributions  $q_n(s|\Theta)$  by setting them equal to the posterior distributions  $q_n(s|\Theta) \leftarrow p(s|y^{(n)}, \Theta)$  while keeping the parameters  $\Theta$  fixed, denoted by  $\Theta'$ . The M-step then optimizes  $\mathcal{F}(\Theta, q_{\Theta'})$  w.r.t. the parameters  $\Theta$  keeping the distributions  $q_n(s|\Theta')$  fixed. If we are given many samples of  $s$  for the posterior then we wish to find:

$$\Theta^{(t+1)} = \operatorname{argmax}_{\Theta} \mathcal{F}(\Theta, q_{\Theta^{(t)}}). \quad (3)$$

This is maximised with the maximum likelihood estimate:

$$\Theta^{(t+1)} = \operatorname{argmax}_{\Theta} \langle \log p(\vec{y}, \vec{s} | \Theta) \rangle_{q(\vec{s}|\Theta^{(t)})}. \quad (4)$$

To keep the derivation focused, we present a simple derivation of the update equations only for a single element of  $W$ . The other parameters are similarly derived and are not covered here. For pedagogical purposes we first derive an update equation *without* a max rule, then we show how this rule should be modified when the max rule is used. Assuming the data  $y^{(n)}$  is distributed as follows:

$$y^{(n)} = ws^{(n)} + \varepsilon \quad (5)$$

where  $\varepsilon \sim \mathcal{N}(\mu = 0; \sigma^2)$ . for  $w$ . This gives the conditional probability as:

$$p(y^{(n)} | s^{(n)}, w) = \frac{1}{\sigma\sqrt{2\pi}} \exp\left(-\frac{1}{2} \left(\frac{y^{(n)} - ws^{(n)}}{\sigma}\right)^2\right) \quad (6)$$

In log space this is a quadratic function:

$$\log p(y^{(n)} | s^{(n)}, w) = c - \log \sigma - \frac{1}{2} \left(\frac{y^{(n)} - ws^{(n)}}{\sigma}\right)^2 \quad (7)$$

and is summed over all datapoints  $n$ . The maximum likelihood solution differentiates this sum with respect to  $w$  (this function is linear in  $\sigma$  and when differentiated  $\sigma$  can be discarded) to find the maximum:

$$\frac{d}{dw} \left[ \sum_n \left( y^{(n)} - s^{(n)}w \right)^2 \right] = 0. \quad (8)$$

From which the maximum is given by:

$$w = \frac{\sum_n s^{(n)} w^{(n)}}{\sum_n s^{(n)2}}. \quad (9)$$

However, we care about finding the ML solution for the max rule:

$$y^{(n)} = \max_h \left\{ W_h s_h^{(n)} \right\} + \varepsilon \quad (10)$$

If the new estimates of  $W_h$  do not change significantly then the simple derivation for  $w$  will apply to  $W_h$ , but only the data for which  $W_h$  is the maximum will be used. The data is going to vary over: the number of images  $N$ , the number of samples per image  $K$ , and we will estimate  $W_{hd}$  per latent dimension  $h$  and observed dimension (or pixel)  $d$ . This leads to:

$$W_{hd} = \frac{\sum_n \sum_k \delta(\text{h is max}) s_{hn}^{(k)} y_d^{(n)}}{\sum_n \sum_k \delta(\text{h is max}) s_{hn}^{(k)2}} \quad (11)$$

which corresponds to the results given in equation (9) of the main paper.  $\delta(\text{h is max})$  is used to identify the index for which  $W_{hd} s_{hn}^k$  is the maximal cause of the data, if it is not the maximal cause, then  $\delta(\cdot)$  returns 0, and the term does not contribute to the sum.

## References

- [1] Neal R, Hinton G. A View of the EM Algorithm that Justifies Incremental, Sparse, and other Variants. In: Jordan MI, editor. Learning in Graphical Models. Kluwer; 1998. .
